# Supplementary material for: Inertial co-focusing of heterogeneous particles in hybrid microfluidic channels with constantly variable cross-sections
Source: Royal Society of Chemistry journal article supplement (doi:10.1039/d4lc00479e), 2024-01-01
Supplement: d4lc00479e1.pdf [file d4lc00479e1.pdf]

## Supplementary materials

### **Inertial co-focusing of heterogeneous particles in hybrid microfluidic channels with constantly variable cross-sections**

Tianwei Zhao,<sup>a</sup> Peng Zeng,<sup>a</sup> Yuanting Zhang,<sup>b</sup> Jinxia Li,<sup>c</sup> Hui Sun,<sup>c</sup> Imrich Gablech,<sup>d</sup> Honglong Chang,<sup>b</sup> Xichen Yuan,<sup>\*b</sup> Pavel Neuzil,<sup>\*b</sup> and Jianguo Feng<sup>\*a</sup>

<sup>a</sup>School of Microelectronics, Hefei University of Technology, Hefei, 230601, China

<sup>b</sup>Ministry of Education Key Laboratory of Micro and Nano Systems for Aerospace, School of Mechanical Engineering, Northwestern Polytechnical University, Xi'an, 710072, China

<sup>c</sup>Department of Medical Laboratory, Xi'an International Medical Centre Hospital, Xi'an 710100, China

<sup>d</sup>Department of Microelectronics, FEEC, Brno University of Technology, Technicka 10, CZ-616 00 Brno, Czech Republic

Corresponding authors:

Jianguo Feng: fengjg@hfut.edu.cn

Xichen Yuan: xichen.yuan@nwpu.edu.cn

Pavel Neuzil: pavel.neuzil@nwpu.edu.cn

## The design of HMC B, C, and D

**HMC B (Fig. S1A):** The outer wall of HMC B was a three-quarter circle arc with a curvature radius of  $5,100\ \mu\text{m}$  ( $R_1$ ), and the inner wall was a three-quarter helix with radii of  $4,500\ \mu\text{m}$  ( $R_2$ ) and  $4,800\ \mu\text{m}$  ( $R_4$ ). This caused the main channel width of HMC B gradually decreasing from  $600\ \mu\text{m}$  (inlet,  $W_1$ ) to  $300\ \mu\text{m}$  (outlet,  $W_2$ ). Twenty semi-circular obstacles were distributed on the inner wall of HMC B with an identical angular distance between adjacent obstacles of  $\alpha = 13^\circ$ . The radii of the obstacles ( $r_2$ ) were determined by a three-quarter helix with radii of  $4,800\ \mu\text{m}$  ( $R_3$ ) and  $4,950\ \mu\text{m}$  ( $R_5$ ), and thus the height of obstacles gradually decreased from  $300\ \mu\text{m}$  (first obstacle near the inlet) to  $150\ \mu\text{m}$  (the last obstacle near the outlet). The obstacles were smoothly filtered by  $300\ \mu\text{m}$  ( $r_1$ ) and  $1,000\ \mu\text{m}$  ( $r_3$ ).

**HMC C (Fig. S1B):** Both outer and inner walls of HMC C were three-quarter circle arcs with curvature radii of  $5,100\ \mu\text{m}$  ( $R_1$ ) and  $4,900\ \mu\text{m}$  ( $R_2=R_4$ ), respectively. This induced an uniform main channel width of  $200\ \mu\text{m}$  ( $W_1=W_2$ ) from inlet to outlet in HMC C. Twenty semi-circular obstacles were distributed on the inner wall with an identical angular distance adjacent obstacles of  $\alpha = 13^\circ$ . The radii of the obstacles ( $r_2$ ) were determined by a three-quarter helix with radii of  $5,000\ \mu\text{m}$  ( $R_3$ ) and  $5,050\ \mu\text{m}$  ( $R_5$ ), and thus the height of obstacles gradually increased from  $100\ \mu\text{m}$  (first obstacle near the inlet) to  $150\ \mu\text{m}$  (the last obstacle near the outlet). The obstacles were smoothly filtered by  $300\ \mu\text{m}$  ( $r_1$ ) and  $1,000\ \mu\text{m}$  ( $r_3$ ).

**HMC D (Fig. S1C):** Both outer and inner walls of HMC D were three-quarter circle arcs with curvature radius of  $5,100\ \mu\text{m}$  ( $R_1$ ) and  $4,900\ \mu\text{m}$  ( $R_2=R_4$ ), respectively. This induced an uniform main channel width of  $200\ \mu\text{m}$  ( $W_1=W_2$ ) from inlet to outlet in HMC D. Twenty semi-circular obstacles with radii of  $100\ \mu\text{m}$  ( $R_3 = R_5 = 5,000\ \mu\text{m}$ ) were distributed on the inner wall with an identical angular distance between adjacent obstacles of  $\alpha = 13^\circ$ . The obstacles were smoothly filtered by  $300\ \mu\text{m}$  ( $r_1$ ) and  $1,000\ \mu\text{m}$  ( $r_3$ ).

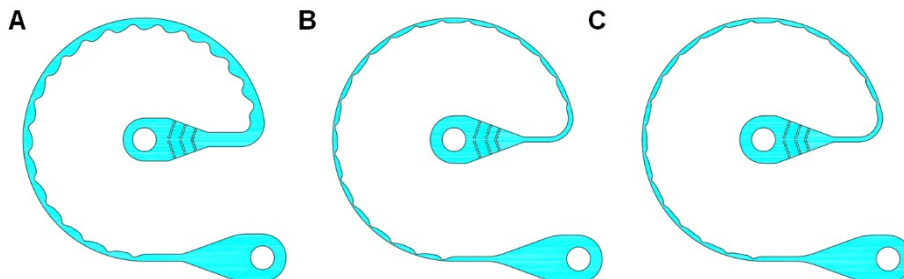

Fig. S1 The design of HMC B, C, and D.

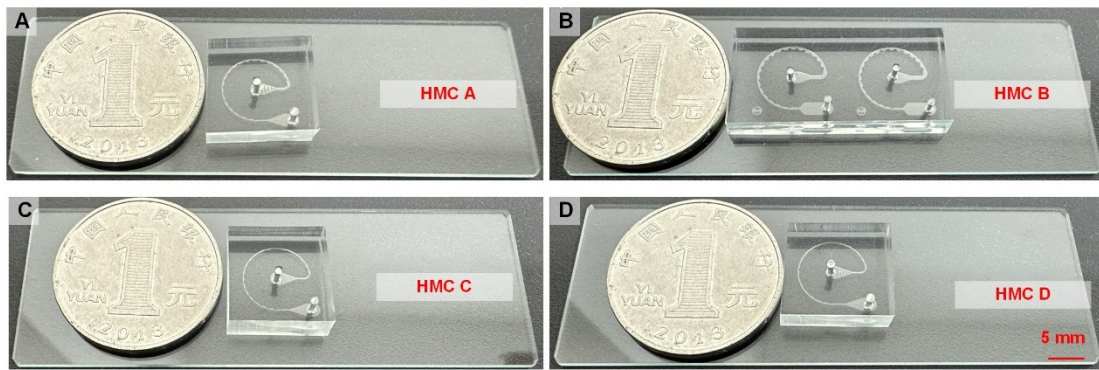

Fig. S2 The fabricated chips of HMC A, B, C, and D using standard soft lithography technique and PDMS molding processes. The coin of one Chinese RMB is used for comparison. The scale bar is 5 mm.

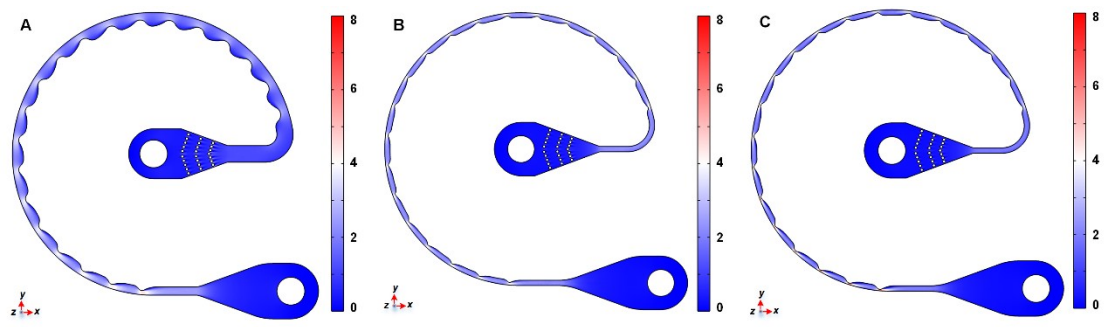

Fig. S3 The color contours indicating main flow velocity magnitude in HMC B, C, and D.

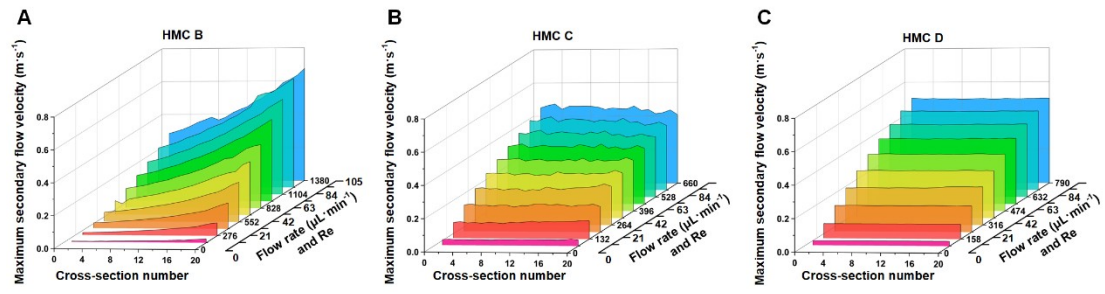

Fig. S4 The maximum secondary flow velocity as functions of cross-section number and flow rate (Re) in HMC B, C, and D. The flow rates vary from 138 to 1,380  $\mu\text{L}\cdot\text{min}^{-1}$  in HMC B, from 66 to 660  $\mu\text{L}\cdot\text{min}^{-1}$  in HMC C, and from 79 to 790  $\mu\text{L}\cdot\text{min}^{-1}$  in HMC D, resulting in identical Re ranging from 10.5 to 105.

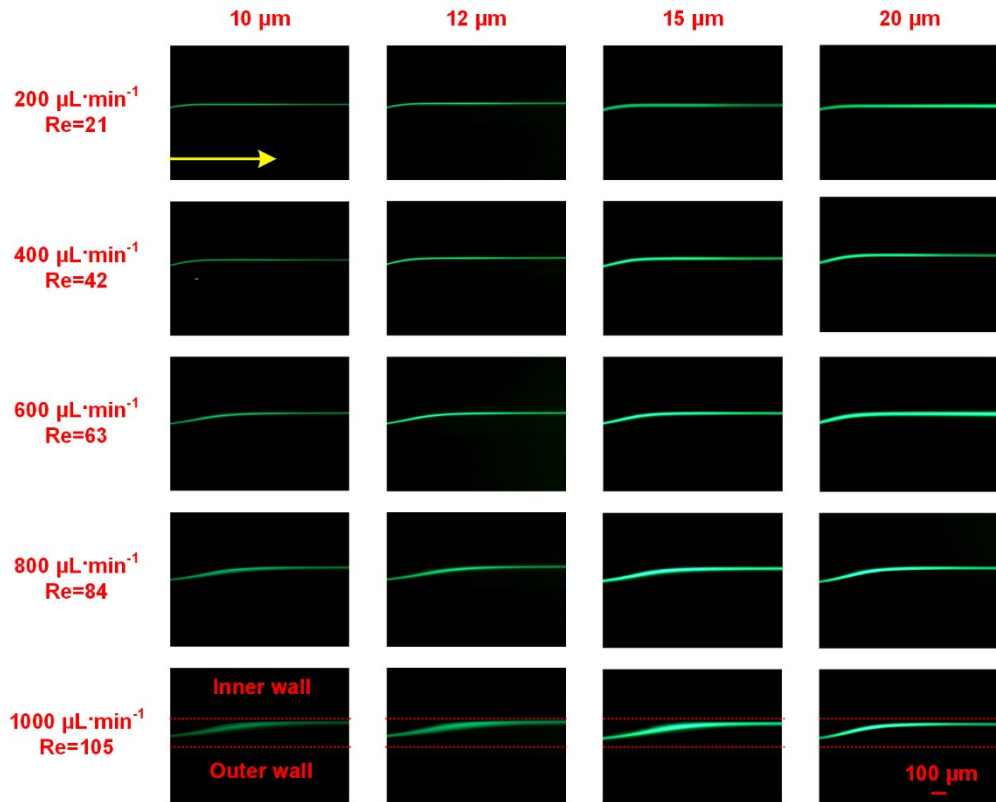

Fig. S5 The fluorescent streaks at the observation area in HMC A at different flow rates of 200  $\mu\text{L}\cdot\text{min}^{-1}$ , 400  $\mu\text{L}\cdot\text{min}^{-1}$ , 600  $\mu\text{L}\cdot\text{min}^{-1}$ , 800  $\mu\text{L}\cdot\text{min}^{-1}$ , and 1,000  $\mu\text{L}\cdot\text{min}^{-1}$ . The particle diameters are 10  $\mu\text{m}$ , 12  $\mu\text{m}$ , 15  $\mu\text{m}$ , and 20  $\mu\text{m}$ . The yellow arrow shows the fluid flow direction. The red dashed lines represent the channel walls. The scale bar is 100  $\mu\text{m}$ . More images can be provided by reasonable requirements.

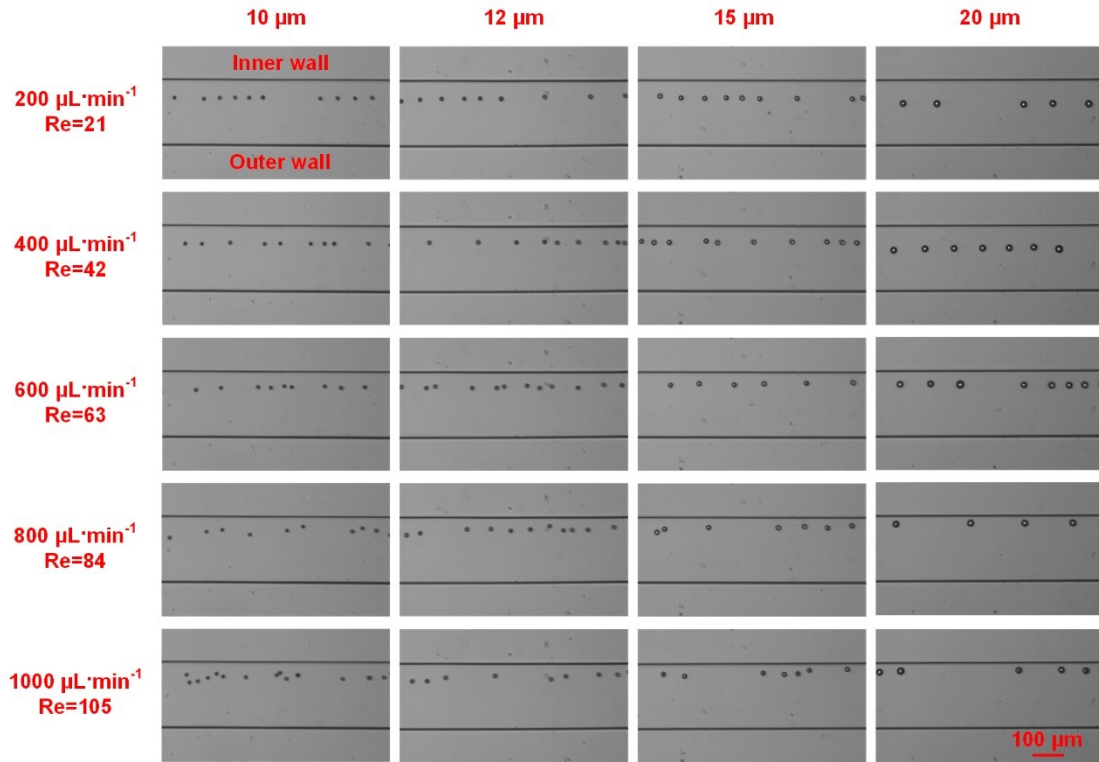

Fig. S6 The images of focused particles captured by a high-speed CCD camera at flow rates of 200  $\mu\text{L}\cdot\text{min}^{-1}$ , 400  $\mu\text{L}\cdot\text{min}^{-1}$ , 600  $\mu\text{L}\cdot\text{min}^{-1}$ , 800  $\mu\text{L}\cdot\text{min}^{-1}$ , and 1,000  $\mu\text{L}\cdot\text{min}^{-1}$ . The particle diameters are 10  $\mu\text{m}$ , 12  $\mu\text{m}$ , 15  $\mu\text{m}$ , and 20  $\mu\text{m}$ . The scale bar is 100  $\mu\text{m}$ . More images can be provided by reasonable requirements.



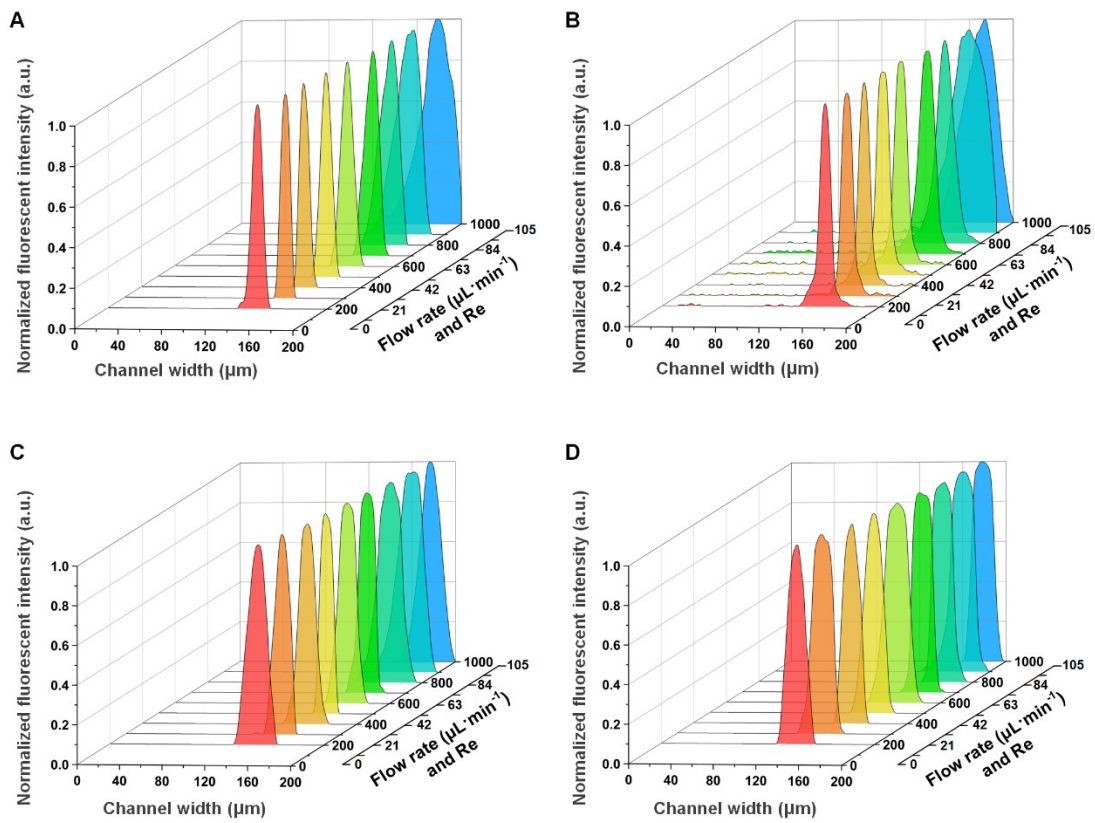

Fig. S7 The fluorescent intensity profiles of fluorescent streak images captured at the observation areas in HMC A with particle diameters of 10  $\mu\text{m}$  (A), 12  $\mu\text{m}$  (B), 15  $\mu\text{m}$  (C), and 20  $\mu\text{m}$  (D). The flow rates vary from 200 to 1,000  $\mu\text{L} \cdot \text{min}^{-1}$  ( $\text{Re}$ : 21 ~ 105).

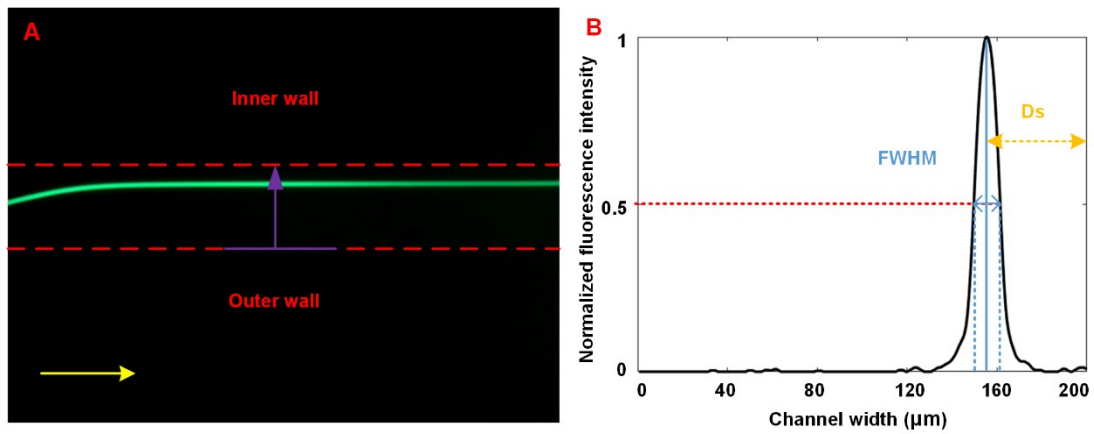

Fig. S8 (A) The fluorescent streak of particle focusing. The yellow arrow shows the fluid flow direction. The red dashed lines represent the channel walls. The purple arrow indicates the position and direction of image processing. (B) The illustration of full width at half maximum and  $D_s$  (the distance between the fluorescent streak center and the inner wall) for the determination of focusing width and focusing position.

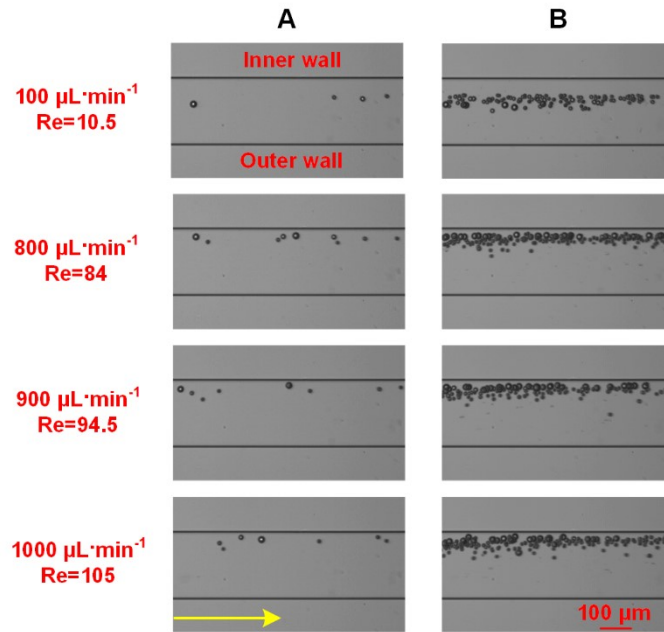

Fig. S9 (A) The images of focused multi-sized particles captured by a high-speed CCD camera at flow rates of 100  $\mu\text{L}\cdot\text{min}^{-1}$ , 800  $\mu\text{L}\cdot\text{min}^{-1}$ , 900  $\mu\text{L}\cdot\text{min}^{-1}$  and 1,000  $\mu\text{L}\cdot\text{min}^{-1}$  in HMC A. A particle mixture with a ratio of 1:1:1:1 of 10  $\mu\text{m}$ , 12  $\mu\text{m}$ , 15  $\mu\text{m}$ , and 20  $\mu\text{m}$  particles are prepared for the co-focusing experiments. The yellow arrow shows the fluid flow direction. (B) The composite images of focused multi-sized particles using 50 single images at flow rates of 100  $\mu\text{L}\cdot\text{min}^{-1}$ , 800  $\mu\text{L}\cdot\text{min}^{-1}$ , 900  $\mu\text{L}\cdot\text{min}^{-1}$  and 1,000  $\mu\text{L}\cdot\text{min}^{-1}$  in HMC A. The scale bar is 100  $\mu\text{m}$ . More images can be provided by reasonable requirements.

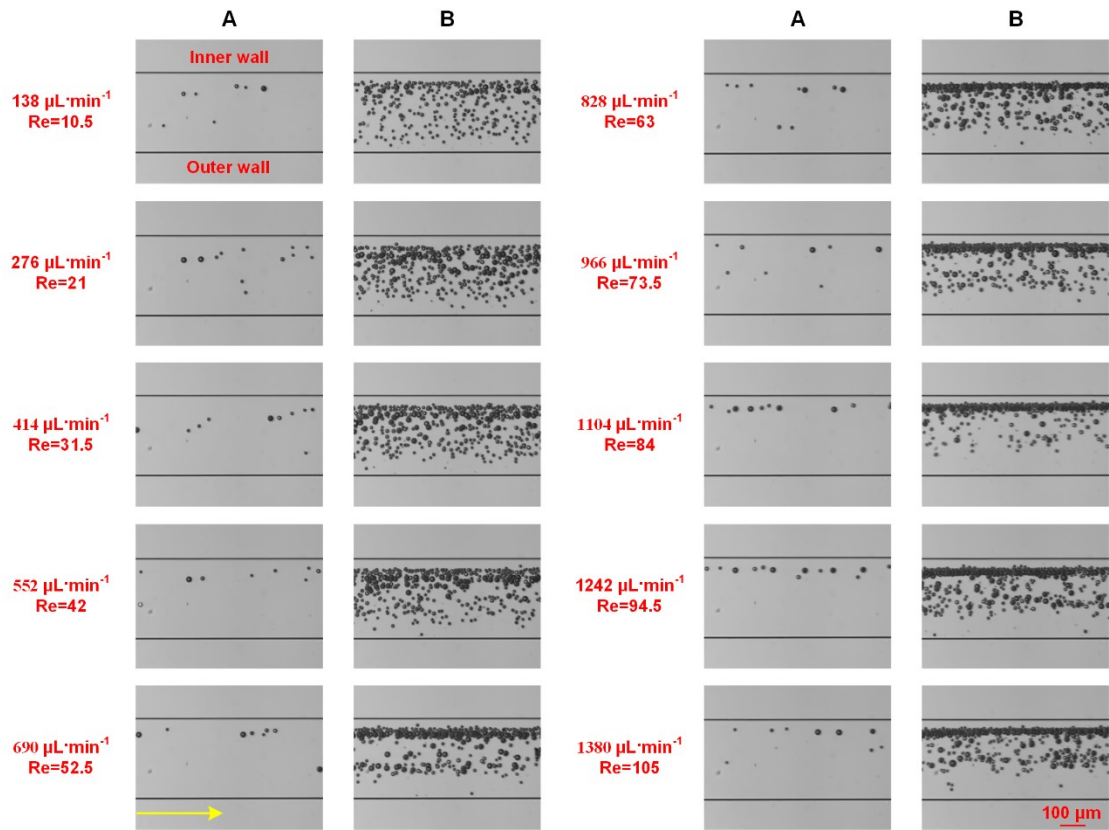

Fig. S10 (A) The images of focused multi-sized particles captured by a high-speed CCD camera at flow rates of  $138 \mu\text{L}\cdot\text{min}^{-1}$  to  $1,380 \mu\text{L}\cdot\text{min}^{-1}$  (Re: 10.5 ~ 105) in HMC B. A particle mixture with a ratio of 1:1:1:1 of  $10 \mu\text{m}$ ,  $12 \mu\text{m}$ ,  $15 \mu\text{m}$ , and  $20 \mu\text{m}$  particles are prepared for the co-focusing experiments. The yellow arrow shows the fluid flow direction. (B) The composite images of focused multi-sized particles using 50 single images at flow rates of  $138 \mu\text{L}\cdot\text{min}^{-1}$  to  $1,380 \mu\text{L}\cdot\text{min}^{-1}$  (Re: 10.5 ~ 105) in HMC B. The scale bar is  $100 \mu\text{m}$ . More images can be provided by reasonable requirements.

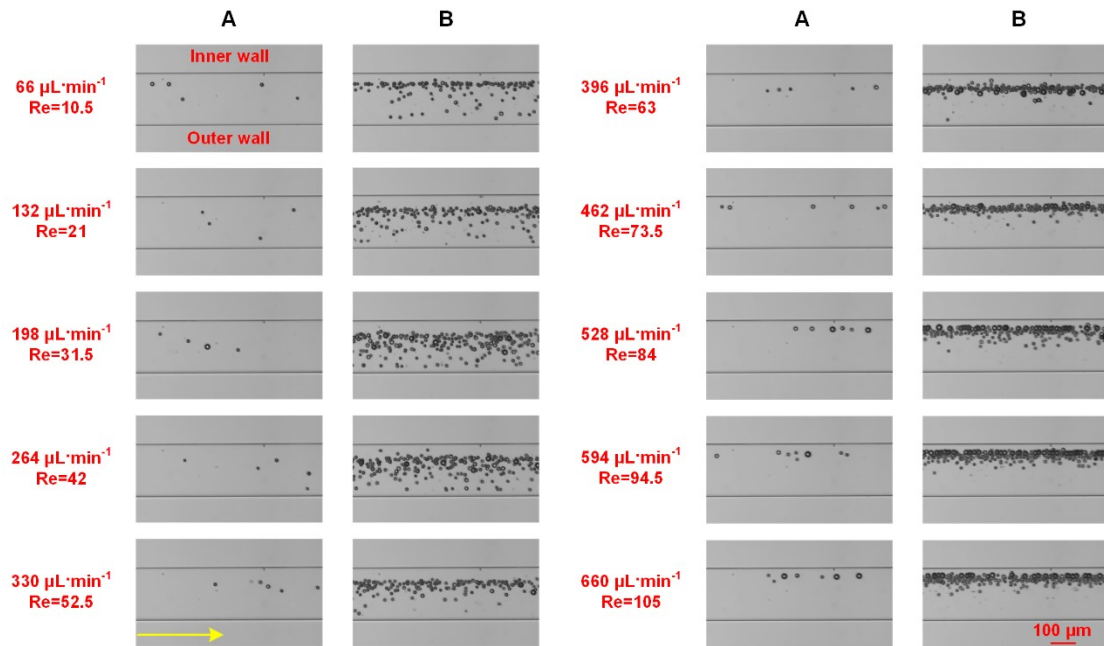

Fig. S11 (A) The images of focused multi-sized particles captured by a high-speed CCD camera at flow rates of  $66 \mu\text{L}\cdot\text{min}^{-1}$  to  $660 \mu\text{L}\cdot\text{min}^{-1}$  (Re: 10.5 ~ 105) in HMC C. A particle mixture with a ratio of 1:1:1:1 of  $10 \mu\text{m}$ ,  $12 \mu\text{m}$ ,  $15 \mu\text{m}$ , and  $20 \mu\text{m}$  particles are prepared for the co-focusing experiments. The yellow arrow shows the fluid flow direction. (B) The composite images of focused multi-sized particles using 50 single images at flow rates of  $66 \mu\text{L}\cdot\text{min}^{-1}$  to  $660 \mu\text{L}\cdot\text{min}^{-1}$  (Re: 10.5 ~ 105) in HMC C. The scale bar is  $100 \mu\text{m}$ . More images can be provided by reasonable requirements.

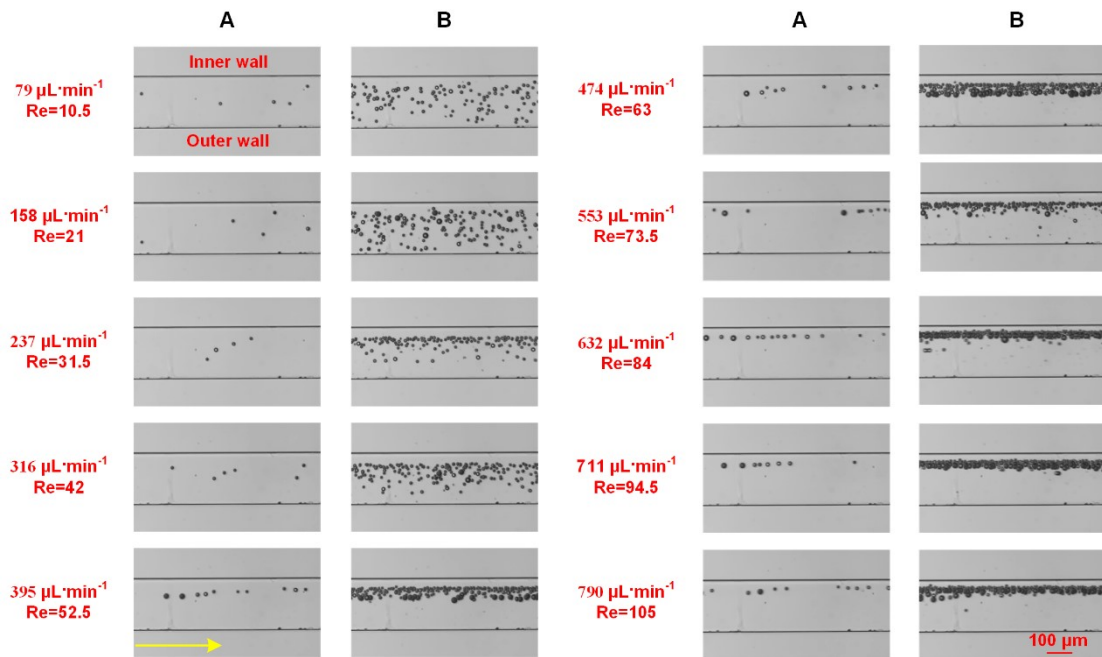

Fig. S12 (A) The images of focused multi-sized particles captured by a high-speed CCD camera at flow rates of  $79 \mu\text{L}\cdot\text{min}^{-1}$  to  $790 \mu\text{L}\cdot\text{min}^{-1}$  (Re: 10.5 ~ 105) in HMC D. A particle mixture with a ratio of 1:1:1:1 of  $10 \mu\text{m}$ ,  $12 \mu\text{m}$ ,  $15 \mu\text{m}$ , and  $20 \mu\text{m}$  particles are prepared for the co-focusing experiments. The yellow arrow shows the fluid flow direction. (B) The composite images of focused multi-sized particles using 50 single images at flow rates of  $79 \mu\text{L}\cdot\text{min}^{-1}$  to  $790 \mu\text{L}\cdot\text{min}^{-1}$  (Re: 10.5 ~ 105) in HMC D. The scale bar is  $100 \mu\text{m}$ . More images can be provided by reasonable requirements.

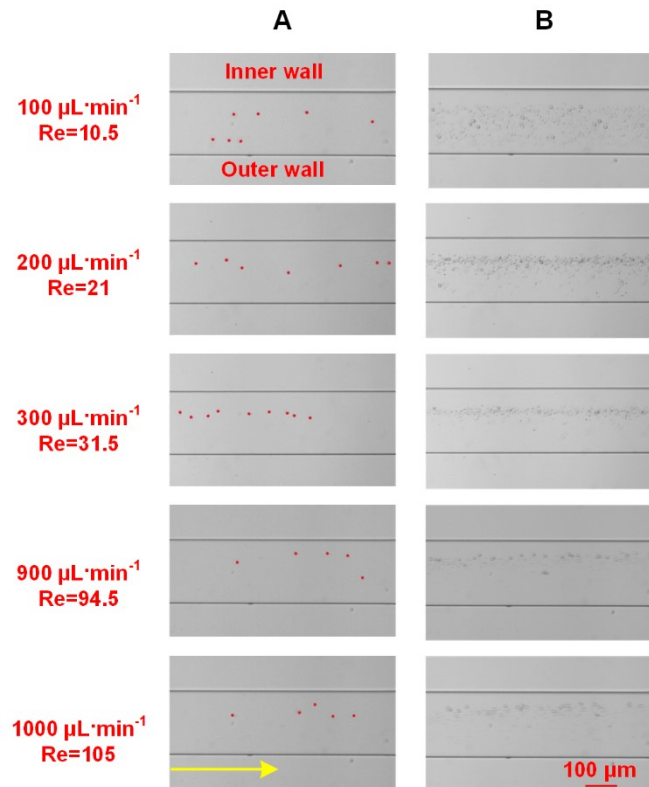

Fig. S13 (A) The images of focused WBCs captured by a high-speed CCD camera at flow rates of  $100 \mu\text{L}\cdot\text{min}^{-1}$ ,  $200 \mu\text{L}\cdot\text{min}^{-1}$ ,  $300 \mu\text{L}\cdot\text{min}^{-1}$ ,  $900 \mu\text{L}\cdot\text{min}^{-1}$  and  $1,000 \mu\text{L}\cdot\text{min}^{-1}$  in HMC A. The WBCs are indicated using red dots, since they were transparent and can hardly be seen in processed figures. Original images showing WBCs focusing are provided in Supplementary materials. The yellow arrow shows the fluid flow direction. (B) The composite images of focused WBCs using 50 single images at flow rates of  $100 \mu\text{L}\cdot\text{min}^{-1}$ ,  $200 \mu\text{L}\cdot\text{min}^{-1}$ ,  $300 \mu\text{L}\cdot\text{min}^{-1}$ ,  $900 \mu\text{L}\cdot\text{min}^{-1}$  and  $1,000 \mu\text{L}\cdot\text{min}^{-1}$  in HMC A. The scale bar is  $100 \mu\text{m}$ . More images can be provided by reasonable requirements.
